# Supplementary material for: Effective photocatalysis of functional nanocomposites based on carbon and TiO2 nanoparticles
Source: Royal Society of Chemistry journal article supplement (doi:10.1039/c3nr01033c), 2013-01-01
Supplement: c3nr01033c.pdf [file c3nr01033c.pdf]

Electronic Supplementary Information

## Effective Photocatalysis of Functional Nanocomposites Based on Carbon and TiO<sub>2</sub> Nanoparticles

Chan Lin<sup>a,b</sup>, Yang Song<sup>b</sup>, Lixin Cao<sup>c</sup>, and Shaowei Chen<sup>\*,b</sup>

<sup>a</sup> *College of Chemistry and Chemical Engineering, Ocean University of China, Qingdao,  
Shandong 266100, CHINA*

<sup>b</sup> *Department of Chemistry and Biochemistry, University of California, 1156 High Street, Santa  
Cruz, California 95064, USA*

<sup>c</sup> *Institute of Materials Science and Engineering, Ocean University of China, Qingdao, 266100,  
P. R. China*

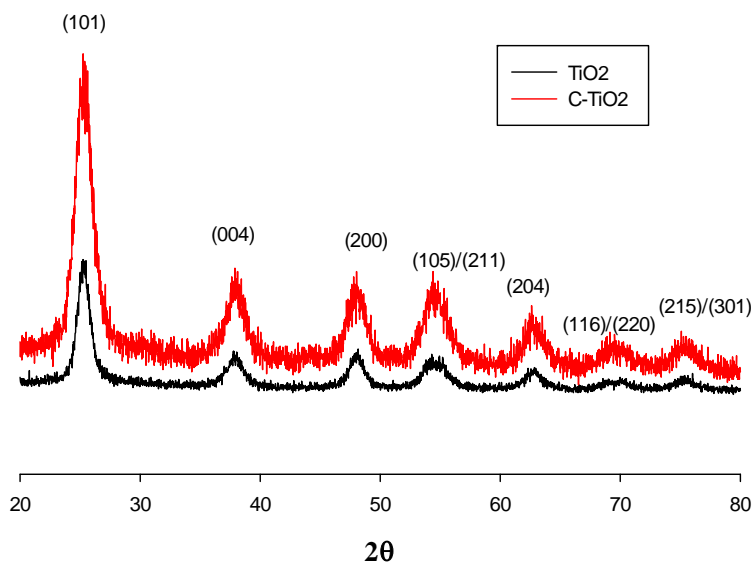

**Figure S1.** XRD patterns of TiO<sub>2</sub> and C-TiO<sub>2</sub> nanoparticles. Both were consistent with those of anatase TiO<sub>2</sub>. In addition, because of poor crystallinity, the carbon nanoparticles were not identified in the measurements.
